# Supplementary material for: Two-dimensional graphene–HfS2 van der Waals heterostructure as electrode material for alkali-ion batteries
Source: RSC Adv. 2020 Aug 17;10(50):30127–38. doi: 10.1039/d0ra04725b (PMC9056275; doi:10.1039/d0ra04725b)
Supplement: RA-010-D0RA04725B-s001 [file RA-010-D0RA04725B-s001.pdf]

## Supplementary Information

### Two-Dimensional graphene-HfS<sub>2</sub> van der Waals heterostructure as electrode material for Alkali-ion batteries.

Gladys King'ori<sup>a, b</sup>, Cecil N M Ouma<sup>c</sup>, Abhishek K Mishra<sup>d</sup>, George O Amolo<sup>b</sup>, Nicholas W Makau<sup>a</sup>.

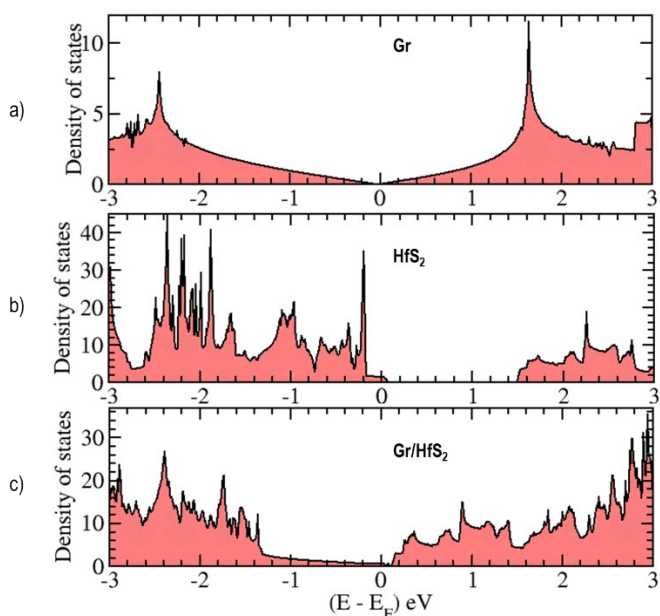

Figure S1 Calculated density of states of (a) 3×3×1 Gr supercell, (b) 2×2×1 HfS<sub>2</sub> supercell and (c) Gr-HfS<sub>2</sub> heterostructure system.

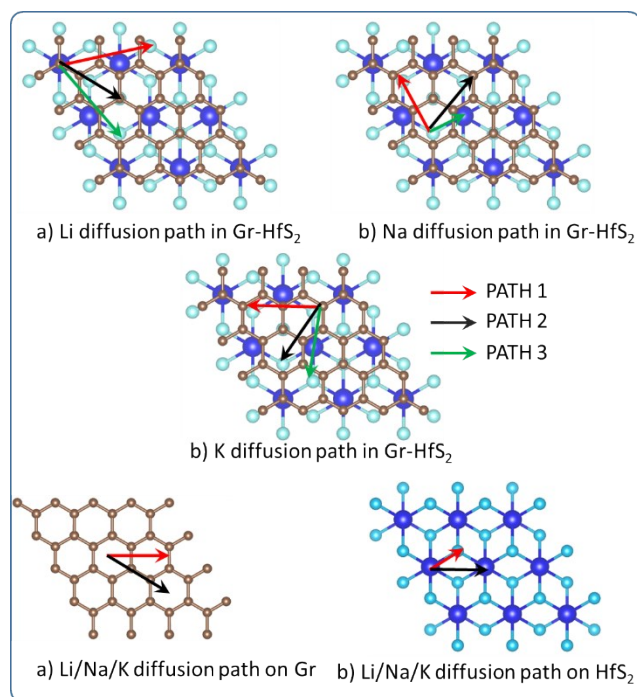

Figure S2: Migration pathways of a) Li b) Na and c) K diffusion between the Gr-HfS<sub>2</sub> heterostructure layers. d) and e) are the migration pathways for Li, Na and K diffusion between the bilayers of Gr HfS<sub>2</sub> respectively.

Table S1: Energy barriers (in eV), associated with diffusing adatoms through the various paths shown in Figure S2.

|                                               | <b>PATH 1</b> | <b>PATH 2</b> | <b>PATH 3</b> |
|-----------------------------------------------|---------------|---------------|---------------|
| Li diffusion through GrHfS <sub>2</sub>       | 0.39          | <b>0.22</b>   | 0.26          |
| Na diffusion through GrHfS <sub>2</sub>       | 0.46          | 0.74          | <b>0.28</b>   |
| K diffusion through GrHfS <sub>2</sub>        | 0.06          | <b>0.05</b>   | 0.09          |
| Li diffusion through Gr bilayer               | <b>0.39</b>   | 0.42          |               |
| Na diffusion through Gr bilayer               | <b>0.26</b>   | 0.54          |               |
| K diffusion through Gr bilayer                | <b>0.11</b>   | 0.13          |               |
| Li diffusion through HfS <sub>2</sub> bilayer | <b>0.10</b>   | 0.69          |               |
| Na diffusion through HfS <sub>2</sub> bilayer | <b>0.32</b>   | 0.50          |               |
| K diffusion through HfS <sub>2</sub> bilayer  | <b>0.19</b>   | 0.40          |               |
